# Supplementary material for: Nanogold Assay Improves Accuracy of Conventional TB Diagnostics
Source: Springer Nature journal article supplement (doi:10.1007/s00408-018-00194-0), 2019-01-04
Supplement: MOESM1 [file 16375622]

**Nanogold Assay Improves Accuracy of Conventional TB Diagnostics**

**Online Supplement**

**Nangold assay**

- - 1. **Fabrication concepts**

Anionic gold nanoparticles (AuNPs) in aqueous solution possess bright colors that vary precisely from bright red to dark violet upon increasing particles’ size in the nano-scale (5 – 100 nanometers). Such colors can be directly visualized by naked eye. Also, AuNPs become aggregated when exposed to salt (e.g. NaCl), since salt disrupts the negatively charged surface of particles that makes them in repulsion state by electrostatic force (Figure 1-A). Accordingly, upon aggregation, size of particles increases and the color of gold solution subsequently shift from red to violet. On the other hand, if plenty of DNA exists in surrounding medium, molecules of DNA amplicon (PCR product) can wrap AuNPs by electrostatic and hydrophobic forces, hence protecting AuNPs from aggregation by salt. In such case, the red color of gold solution is preserved (Figure 1-B) [1].

- - 1. **Preparation of AuNPs solution**

AuNPs were synthesized using citrate reduction method [2] using aqueous solution of hydrogen tetrachloroaurate (III) (HAuCl4.3H2O) (1mM) (99.99%) (*Sigma Aldrich, Germany)* and trisodium citrate (*Sigma Aldrich, Germany)*. Synthesized AuNPs were characterized using spectrophotometer measurement in the range of 400 – 700 nm, Zeta potential for particles charge, scanning electrom microscopy (SEM) imaging for parrticles shape and size. Synthesized AuNPs solution was red in color with absorbance peak of 520 nm, and zeta potential of -33 mV. Particles were spherical in shape of 14 nm ± 3 nanometers size.

**3. TB detection using Nanogold Assay**

**TB DNA Extraction**

Collected sputum sample was processed within 2 h of collection. 1.5 ml sputum was directly inactivated by heating at 80°C for 20 min. 200 μl sputum was then used for further extraction steps using the QiaAMP Stool Kit (*Qiagen*, Hilden, Germany) according to the manufacturer's protocol [3]. DNA extracts were stored at -20°C for further steps of TB Nanogold assay when culture results were obtained.

### Conventional PCR

### PCR was done targeting IS6110 TB DNA locus. Sequences of primers were obtained from Kolk et al. [4] as follows: forward primer (5’-CGTGAGGGCATCGAGGTGGC); reverse primer (5’- GCGTAGGCGTCGGTGACAAA). PCR final volume was 50 µl distributed as follows: 25 µl Master Mix (*Promega*, *Wisconsin, USA*), 2 µl for each primer (20 µM) (*IDT, Iowa, USA*), 17 µl nuclease-free water, and 4 µl DNA template. PCR was performed using MyCycler (*Bio-Rad, California, USA*). Initial denaturation was done at 95°C for 2 min. PCR was done in 35 cycles:, denaturation at 95 °C for 30 sec, annealing at 67°C for 30 sec, extension at 72 °C for 45 s. Final extension was done at 72 °C for 2 min. The PCR product was then purified using [*QIAquick PCR* Purification Kit](https://www.qiagen.com/us/shop/sample-technologies/dna/dna-clean-up/qiaquick-pcr-purification-kit/) ( *Qiagen, Hilden, Germany*) according to manufacturer protocol [5].

### Colorimetric result

### TB detection was achieved by directly adding 30 µl of gold solution to 2.5 µl NaCl (50 µM) (*Sigma Aldrich, Germany)*, 1 µL Tris-HCl (10 µM, pH=7.4) (*Sigma Aldrich, Germany)*, and 5 µl PCR product (total volume = 40 µl). The colorimetric result was directly observed by naked eye after 2 min of adding gold solution. In case TB+ sample, gold solution preserved the red color (positive result), while the color shifted to violet in TB- sample (negative result). For TB+ sample, millions copies of TB DNA amplicon ought to exist in test solution which adsorb onto AuNPs’ surface and protect them from aggregation. Hence, the red color of gold solution would be preserved. While in TB- sample, test solution lacks DNA abundance where AuNPs become exposed to salt and got aggregated. Accordingly, the color of gold solution shifts from red to violet (Figure 2).

### References

1. Koo KM, Sina AAI, Carrascosa LG, et al (2015) DNA-Bare Gold Affinity Interactions: Mechanism and Applications in Biosensing. Anal Methods 7:7042–7054 . doi: 10.1039/C5AY01479D

2. Turkevich J, Stevenson PC, Hillier J (1951) A Study Of The Nucleation And Growth Processes In The Synthesis Of Colloidal Gold. Discuss Faraday Soc 11:

3. Qiagen (2012) QIAamp ® DNA Stool Handbook For DNA purification from stool samples

4. Kolk AHJ, Schuitema ARJ, Kuijper S, et al (1992) Detection of Mycobacterium tuberculosis in clinical samples by using polymerase chain reaction and a nonradioactive detection system. J Clin Microbiol 30:2567–2575

5. Qiagen (2008) QIAquick PCR Purification Kit Protocol


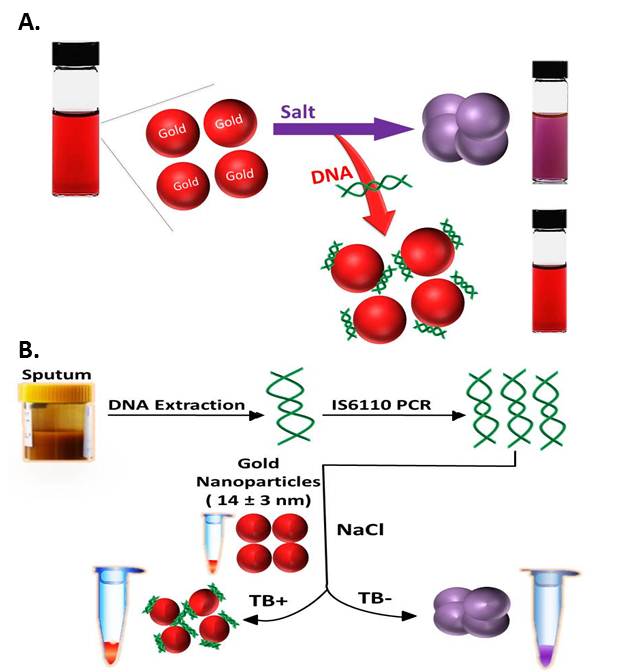


**Figure 1. Fabrication concepts and detection steps of TB Nanogold assay.**

**A:** Fabrication concepts of TB nanogold assay. Salt aggregates gold nanoparticles (AuNPs) in aqueous solution leading to red-to-violet color shift, while DNA molecules preserves the red color of gold solution through adsorbance onto AuNPs surface hindering their aggregation by salt. **B:** Detection steps of TB nanogold assay. First, DNA is extracted from collected sputum sample. Second, PCR is done targeting TB DNA. Third, purified PCR product is added to salt. Finally, the red solution of AuNPs is added. In case of TB+ sample, TB amplicons adsorb onto AuNPs surface and prevent their aggregation by salt, hence, the red color of AuNPs solution is preserved. While in TB- sample, AuNPs are exposed to salt due to lack of DNA abundance, and get aggregated with subsequent red-to-violet color shift of AuNPs solution

**
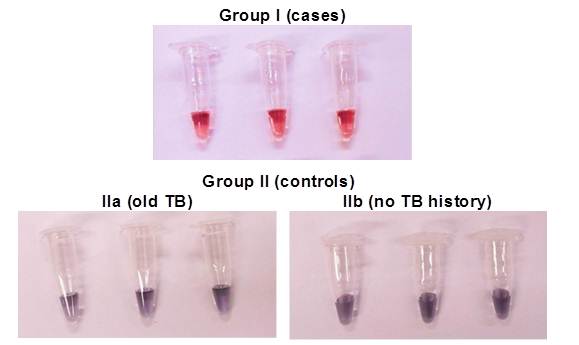
**

**Figure 2. Colorimetric results of nanogold assay for patients groups.**

In group I (active TB cases), the red color of gold solution was preserved indicating positive result. While the color of gold solution shifted from red to dark violet for both subgroups of controls: IIa involved TB negative patients who had a previous history of TB infection, but currently cured after receiving therapy; IIb involved TB negative patients who suffered from any chest disease (COPD, pneumonia) and had never been infected by pulmonary TB.
